# Supplementary material for: Salmon gut microbiota correlates with disease infection status: potential for monitoring health in farmed animals
Source: PubMed Central journal article supplement (PMC8056536; doi:10.1186/s42523-021-00096-2), 2021-04-20
Supplement: 42523_2021_96_MOESM3_ESM.pdf [file 42523_2021_96_MOESM3_ESM.pdf]

## Additional file 3

### DNA extraction protocol

**DNA extraction reagent composition** (for 50 mL of each buffer):

| DNA Binding buffer, 50 mL |                               | Amount | Unit | Final concentration | Unit |
|---------------------------|-------------------------------|--------|------|---------------------|------|
|                           | GuSCN                         | 29.5   | gr   | 5                   | M    |
|                           | Citrate buffer, pH 5          | 5      | ml   | 10                  | mM   |
|                           | n-lauryl sarcosine            | 2.5    | ml   | 1                   | %    |
|                           | ddH <sub>2</sub> O (to 50 ml) |        |      |                     |      |
|                           |                               |        |      |                     |      |
| Wash Buffer A, 50 mL      |                               |        |      |                     |      |
|                           | GuSCN                         | 11.8   | gr   | 2                   | M    |
|                           | Isopropanol                   | 30     | ml   | 60                  | %    |
|                           | Citrate buffer, pH 5          | 5      | ml   | 10                  | mM   |
|                           | Tween-20                      | 50     | ul   | 0,05                | %    |
|                           | ddH <sub>2</sub> O (to 50 ml) |        |      |                     |      |
|                           |                               |        |      |                     |      |

|                         |                  |    |    |    |   |
|-------------------------|------------------|----|----|----|---|
| Washing Buffer B, 50 ml |                  |    |    |    |   |
|                         | Absolute Ethanol | 40 | ml | 80 | % |
|                         | ddH2O            | 10 | ml |    |   |

The protocol was followed for both distal gut content and distal gut mucosa samples.

### **Preparation of buffers**

Prior to the extraction, G-beads were washed and premixed with Binding buffer (buffer B): Briefly, 1.5 ml of silica magnetic beads (G-BIOSCIENCES®) were transferred to a 2 ml Eppendorf tube. The tube was placed on a magnetic rack and the supernatant removed. Beads were washed twice in 2 ml of TE buffer and then added to 20 ml of buffer B (15 µl of beads + 200 µl binding buffer B for each individual sample). The pre-mixed solution containing buffer B + beads was stored in the fridge, protected from light and then re-equilibrated at room temperature before use.

### **Extraction procedure:**

Selected samples stored in 1x DNA/RNA Shield™ buffer (Zymo Research) were thawed and vortexed a few seconds, followed by bead beating, using a TissueLyser (Qiagen) for 3 minutes at 30Hz. After cell lysis, samples were centrifuged at 17000xg for 1 minute. For each lysed sample, 200 µl of supernatant were transferred to a new Eppendorf tube and 500 ul were stored in another tube as a backup and frozen at -20°C.

200 µl of buffer B + beads were added to each sample and incubated on a thermal shaker for 15 minutes at 10°C, 1500 rpm. A negative control was included for each day of extraction to check

for contamination. For the negative control, 200  $\mu$ l of buffer B + beads were mixed with 200  $\mu$ l of 1x DNA/RNA Shield buffer, the original buffer in which the samples had been conserved.

After the incubation, samples were shortly spun down and placed on a magnetic rack. Beads were allowed to settle for 1 minute and the supernatant subsequently removed and discarded. Tubes were removed from the magnet and the DNA containing beads were washed in 200  $\mu$ l of buffer C, followed by two washes in 80% ethanol to remove salts. After the final ethanol wash the beads were allowed to air-dry (on the magnet) for 5 minutes.

After 5 minutes of evaporation, 50  $\mu$ l of EB elution buffer (10 mM Tris-HCl) were added to each sample. Tubes were incubated for 5 minutes at 25°C (off magnet), at 1400 rpm before being returned to the magnet. Beads were allowed to settle and the DNA containing supernatant transferred to a new Eppendorf Lo-Bind 1.5 ml tube. Samples were stored at -20°C until further downstream processing.
